# Supplementary material
Source: HighWire-hosted journal article supplement (doi:10.1101/rna.078993.121)
Supplement: Supplemental_Figure_Legends.docx [file Supplemental_Figure_Legends.docx]

**Alternative splicing regulation of membrane trafficking genes during myogenesis**

Hinkle ER1,2#, Wiedner HJ1,2#, Torres E1, Jackson M1, Black AJ1, Blue RE1, Harris SE3, Guzman BB4, Gentile GM1,2, Lee EY1, Tsai Y-H5 , Parker J2, 5, Dominguez D4,5, Giudice J1,2,6,*

**1.** Department of Cell Biology and Physiology. **2.** Curriculum in Genetics and Molecular Biology (GMB). **3.** Biochemistry and Biophysics Department. **4.** Department of Pharmacology. **5.** Lineberger Comprehensive Cancer Center. **6.** McAllister Heart Institute. School of Medicine, The University of North Carolina at Chapel Hill, Chapel Hill, NC 27599, USA. #These authors contributed equally to this work. *****Correspondence jimena_giudice@med.unc.edu

**SUPPLEMENTAL FIGURE LEGENDS**

**Supplemental Figure S1. Characterization of the localization of the alternative regions within the structural domains of the membrane trafficking proteins. A-J.** Schematic representation of the protein isoforms of membrane trafficking proteins chosen for this study: CLTC (**A**), AP2A1 (**B**), CLTA (**C**), FNBP1 (**D**), SCRIB (**E**), TRIP10 (**F**), TMED2 (**G**), CAPZB (**H**), FBLN2 (**I**), GAPVD1 (**J-K**). aa: amino acid. C: C-terminus. N: N-terminus. nt: nucleotides.

**Supplemental Figure S2. Levels of inclusion of the alternative regions in membrane trafficking genes in neonatal tissues.** Alternative splicing of trafficking genes in neonatal (postnatal day 4.5) mouse tissues was evaluated by RT-PCR and quantified by densitometry. Heatmap shows the summary of the results for the 11 events under study. Striated muscle tissues are labeled in red. nt: nucleotides. PSI: percent spliced in. ss: splice site.

**Supplemental Figure S3. Membrane trafficking genes are regulated by alternative splicing in a tissue-specific manner and during C2C12 cell differentiation. A-C.** Alternative splicing of trafficking genes in mouse tissues was evaluated by RT-PCR assays in postnatal day 4.5 (p4.5) and adult tissues: Trip10 (**A**), Gapvd1 (**B**), and Tmed2 (**C**). Results are shown as mean+SEM, *n*=3, **p*<0.05, Welch’s T-test. **D**.Gene ontology analysis of genes differentially spliced with |ΔPSI|≥0.1 during C2C12 cell differentiation. ΔPSI was defined as the difference between the PSI in myotubes and the PSI in myoblasts (ΔPSI=PSImyotubes-PSImyoblasts). Dia: diaphragm. EDL: extensor digitorum longus. FDB: flexor digitorum brevis. PSI: percent spliced in. TA: tibialis anterior.

**Supplemental Figure S4. Treatment with chromatin-modifying drugs alters mRNA expression levels of membrane trafficking genes.** Gene expression of membrane trafficking genes after treatment of trichostatin A (TSA) or camptothecin (CPT) in C2C12 myotubes was evaluated by qPCR. Results are shown as mean+SEM*. n*=4, **p*<0.05, One-way ANOVA with Bonferroni *post hoc* test to account for multiple comparisons.

**Supplemental Figure S5. The RBPs CELF1 and CELF2 do not regulate splicing of membrane trafficking genes. A.** Splicing of trafficking genes (11 events) upon knockdown of CELF1 was evaluated by RT-PCR assays and quantified by densitometry. Quantifications from three independent experiments are shown in the heatmap of **Fig. 4J**. **B.** CELF1 and CELF2 protein levels were evaluated by western blotting. **C.** Splicing of the same trafficking genes upon knockdown of CELF2 was evaluated by RT-PCR experiments and quantified by densitometry. Quantifications are shown in the heatmap of **Fig. 4J** (*n*=3). **D.** CELF1 and CELF2 protein levels were evaluated by western blotting. GAPDH: Glyceraldehyde-3-Phosphate Dehydrogenase. bp: base pairs. luc: luciferase. nt: nucleotides. -: mock.

**Supplemental Figure S6. The RBPs MBNL1 and MBNL2 do not regulate splicing of membrane trafficking genes. A.** Splicing of trafficking genes (11 events) upon knockdown of MBNL1 was evaluated by RT-PCR assays and quantified by densitometry. Quantifications from three independent experiments are shown in the heatmap of **Fig. 4J***.* **B.** MBNL1 protein levels were evaluated by western blotting. **C.** Splicing of the same trafficking genes upon knockdown of MBNL2 was evaluated by RT-PCR experiments and quantified by densitometry. Quantifications from three independent experiments are shown in the heatmap of **Fig. 4J**. **D.** MBNL2 protein levels were evaluated by western blotting after knockdown of MBNL2. bp: base pairs. luc: luciferase. nt: nucleotides. -: mock.

**Supplemental Figure S7. The RBPs PTBP2 and RBFOX2 do not regulate splicing of membrane trafficking genes. A.** Splicing of trafficking genes (11 events) upon knockdown of PTBP2 was evaluated by RT-PCR assays and quantified by densitometry. Quantifications from three independent experiments are shown in the heatmap of **Fig. 4J**. **B.** PTBP2 protein levels were evaluated by western blotting. **C.** Splicing of the same trafficking genes upon knockdown of RBFOX2 was evaluated by RT-PCR experiments and quantified by densitometry. Quantifications from three independent experiments are shown in the heatmap of **Fig. 4J**. **D.** RBFOX2 protein levels were evaluated by western blotting. GAPDH: Glyceraldehyde-3-Phosphate Dehydrogenase. bp: base pairs. ctrl: control si-RNA. H3: Histone H3. luc: luciferase. nt: nucleotides. -: mock.

**Supplemental Figure S8. The RBPs PTBP1 and QKI regulate splicing of membrane trafficking genes. A-B.** Splicing of trafficking genes (11 events) upon knockdown of PTBP1 (**A**) and QKI (**B**) was evaluated by RT-PCR assays and quantified by densitometry with mean+SEM, *n*=3, **p*<0.05, Welch’s T-test. Quantifications from three independent experiments are shown in the heatmap of **Fig. 4J** and some examples are presented on **Fig. 5B, D**. bp: base pairs. luc: luciferase. nt: nucleotides. -: mock.

**Supplemental Figure S9. TSA and CPT treatment effects are mediated by changes in RBP expression. A-E.** Expression of PTBP1, PTBP2, RBFOX2, QKI, CELF1, CELF2, MBNL1, and MBNL2 was determined by western blot following TSA (**A**) or CPT (**B**) treatment and quantified by densitometry (**C**-**E**) with mean+SEM, *n*=3, **p*<0.05, Welch’s T-test. **F-H.** The correlation between ΔPSI values after trichostatin A (TSA) or camptothecin (CPT) treatment and QKI (*left*) or PTBP1 (*right*) depletion are shown, significance test for correlation, based on a T-distribution. DMSO: dimethyl sulfoxide. luc: luciferase.

**Supplemental Figure S10. PTBP1 and RBFOX2 binding motifs are enriched in introns upstream and downstream of alternative exons that become included during myogenesis, respectively. A-B.** Bioinformatic motif analysis of the intron upstream (**A**) and downstream (**B**) of alternative exons that are regulated during myogenesis. Negative ΔPSI (ΔPSI≤-0.1) (*left*) and positive ΔPSI (ΔPSI≥0.1) (*right*) were evaluated independently.Significant motifs (*p*<0.05) are indicated in red with text describing the enriched motif. Up to 500 nt of the upstream intron and downstream intron were used for analysis. ΔPSI was defined as the difference between the PSI in myotubes and the PSI in myoblasts (ΔPSI=PSImyotubes-PSImyoblasts).
